# Supplementary material for: A predictive viscosity model for aqueous electrolytes and mixed organic-inorganic aerosol phases
Source: Copernicus journal article supplement (doi:10.5194/acp-2021-836), 2021-10-25
Supplement: Supplementary file 1 [file acp-2021-836-supplement.pdf]

# Supplementary Information for

## *A predictive viscosity model for aqueous electrolytes and mixed organic–inorganic aerosol phases*

Joseph Lilek <sup>1</sup> and Andreas Zuend <sup>1</sup>

<sup>1</sup>Department of Atmospheric and Oceanic Sciences, McGill University, Montréal, Quebec, Canada

**Correspondence:** Andreas Zuend (andreas.zuend@mcgill.ca)

### S1 Derivation for cation–anion viscosity contribution weighting

This section further describes the cation–anion contribution treatment introduced in Section 2.3 of the main text. For multi-ion mixtures, a special weighting must be derived to be fully consistent with all potential cation–anion pairings and such that there is no double counting of the contributions of a specific ion when paired up with the various anions. This can be accomplished

5 by treating the aqueous solution as a mixture of (dissolved) charge-neutral cation–anion pairs, with each cation combined with each anion proportionally to the charge-weighted ion amounts involved in the solution overall. That is, we can think of the ions present in the solution as being the result of dissolving various possible electrolyte components (initially). The goal here is to provide a means of quantifying a “fair” share of each possible electrolyte component (as a binary, charge-balanced cation–anion unit) in a clearly defined manner. Consider the total of positive charges in the aqueous electrolyte mixture,  $\sum_{c=1}^{J_c} n_c \cdot z_c$ ,

10 which is equivalent in magnitude to the total of negative charges,  $\sum_{a=1}^{J_a} n_a \cdot |z_a|$ , for an overall charge-neutral solution. We can define the charge fraction  $\psi_a$  as the absolute amount of charge contributed by anion  $a$  relative to the sum of absolute charge contributions from all negative charges present (or alternatively, relative to the sum of all positive ones) in the mixture,

$$\psi_a = \frac{n_a \cdot |z_a|}{\sum_{a'=1}^{J_a} n_{a'} \cdot |z_{a'}|}, \quad (\text{S1})$$

and introduce a cation–anion pair contribution weighting term,

$$15 \quad \tau'_{c,a} = \frac{n_c}{\nu_{c,el}} \cdot \psi_a. \quad (\text{S2})$$

$\tau'_{c,a}$  represents the fractional amount of the hypothetical, neutral electrolyte component  $el$  consisting of cation  $c$  and anion  $a$ , where  $\nu_{c,el}$  is the stoichiometric number of cations in a formula unit of this electrolyte. Note that there is only one such cation–anion combination per specific type of cation and anion. In Eqs. (17 – 18),  $x_c$  can be understood as the molar amount of cation  $c$  in solution, normalized by the total molar amount of all species. Therefore, it is clear that either using an absolute,

20 mole-based scaling ( $\tau'_{c,a}$ ) or a relative mole-fraction-based scaling ( $\tau_{c,a}$ , Eq. 18) offer a description of the amounts of each “input” electrolyte component contributing ions to a solution (or unit amount of solution). The prime notation is removed in Eqs. (17 – 18) to indicate that mole-fraction-based scaling is used.

To illustrate the utility and consistency of this approach, consider an example mixture containing 2 mol NaCl, 9 mol MgSO<sub>4</sub>, and 3 mol NaBr in water. If all these electrolytes completely dissociate (as is assumed by AIOMFAC), the resulting solution composition can be written as 5 mol Na<sup>+</sup>, 2 mol Cl<sup>-</sup>, 9 mol Mg<sup>2+</sup>, 9 mol SO<sub>4</sub><sup>2-</sup>, and 3 mol Br<sup>-</sup> in solution. From these two cations and three anions, the following six charge-neutral cation–anion pairs can be formed: NaCl, MgSO<sub>4</sub>, NaBr, MgCl<sub>2</sub>, Na<sub>2</sub>SO<sub>4</sub>, and MgBr<sub>2</sub>.

When describing the viscosity contributions from cation–anions pairs using Eq. (14), in order to avoid excessive weight being attributed to a certain ion pair, we advocate that one should strive for an unbiased representation of the solution by means of accounting for all possible contributions from cation–anion pairs in a charge-equivalent manner of weighting. As a counter-example, an excessive, unbalanced weighting would likely occur if one were to pair, e.g., all Mg<sup>2+</sup> with all SO<sub>4</sub><sup>2-</sup> present, thereby giving a relatively high weight to the  $c_{\text{Mg}^{2+}, \text{SO}_4^{2-}}$  parameter (Eq. 14) in the mixture viscosity calculation. This may bias this model prediction toward the viscosity of aqueous MgSO<sub>4</sub> (at the same ionic strength) and the resulting value may be substantially different from a viscosity calculation involving a different choice of cation–anion pairing, such as if we had first combined all Na<sup>+</sup> with SO<sub>4</sub><sup>2-</sup> and only the remainder of sulfate with magnesium. Hence, the specific sequence of pairing the cations with the anions into hypothetical electrolyte components will lead to different viscosity predictions by the model (if several options are possible), making the prediction dependent on seemingly arbitrary choices and thereby ambiguous. Such ambiguity can be circumvented by introducing our  $\tau'_{c,a}$ -based weighting, in which a fractional amount of each cation is combined with a fractional amount of each anion, proportional to the charge-weighted amounts of the anions and the stoichiometry of the electrolyte unit formed.

In our example, Na<sup>+</sup> is paired with all anions (Cl<sup>-</sup>, SO<sub>4</sub><sup>2-</sup>, Br<sup>-</sup>) in such a way that the largest fractional amount of Na<sup>+</sup> is paired with SO<sub>4</sub><sup>2-</sup>, the second-largest amount is paired with Br<sup>-</sup>, and the smallest amount is paired with Cl<sup>-</sup>. We can calculate the exact proportions for Na<sup>+</sup> by computing the charge-based fractions for each counter-ion (anion) using Eq. (S1). Here,

$$\psi_{\text{Cl}^-} = \frac{n_{\text{Cl}^-} \cdot |z_{\text{Cl}^-}|}{\sum_{J_c} n_c \cdot z_c} = \frac{2 \cdot |-1|}{(5 \cdot 1) + (9 \cdot 2)} = \frac{2}{23} \quad (\text{S3})$$

$$\psi_{\text{Br}^-} = \frac{n_{\text{Br}^-} \cdot |z_{\text{Br}^-}|}{\sum_{J_c} n_c \cdot z_c} = \frac{3 \cdot |-1|}{(5 \cdot 1) + (9 \cdot 2)} = \frac{3}{23} \quad (\text{S4})$$

$$\psi_{\text{SO}_4^{2-}} = \frac{n_{\text{SO}_4^{2-}} \cdot |z_{\text{SO}_4^{2-}}|}{\sum_{J_c} n_c \cdot z_c} = \frac{9 \cdot |-2|}{(5 \cdot 1) + (9 \cdot 2)} = \frac{18}{23}, \quad (\text{S5})$$

while for each of the Na<sup>+</sup>–anion pairs, Eq. (S2) yields

$$\tau'_{\text{Na}^+, \text{Cl}^-} = \frac{n_{\text{Na}^+}}{\nu_{\text{Na}^+, \text{NaCl}}} \cdot \psi_{\text{Cl}^-} = \frac{5 \text{ mol}}{1} \cdot \frac{2}{23} = \frac{10}{23} \text{ mol} \quad (\text{S6})$$

$$\tau'_{\text{Na}^+, \text{Br}^-} = \frac{n_{\text{Na}^+}}{\nu_{\text{Na}^+, \text{NaBr}}} \cdot \psi_{\text{Br}^-} = \frac{5 \text{ mol}}{1} \cdot \frac{3}{23} = \frac{15}{23} \text{ mol} \quad (\text{S7})$$

$$\tau'_{\text{Na}^+, \text{SO}_4^{2-}} = \frac{n_{\text{Na}^+}}{\nu_{\text{Na}^+, \text{Na}_2\text{SO}_4}} \cdot \psi_{\text{SO}_4^{2-}} = \frac{5 \text{ mol}}{2} \cdot \frac{18}{23} = \frac{45}{23} \text{ mol}. \quad (\text{S8})$$

The  $\tau'_{c,a}$  value can be calculated for the other five potential charge-neutral cation–anion pairs, yielding  $\tau'_{\text{Mg}^{2+}, \text{SO}_4^{2-}} = \frac{162}{23} \text{ mol}$ ,  $\tau'_{\text{Na}^+, \text{Br}^-} = \frac{15}{23} \text{ mol}$ ,  $\tau'_{\text{Na}^+, \text{SO}_4^{2-}} = \frac{45}{23} \text{ mol}$ ,  $\tau'_{\text{Mg}^{2+}, \text{Cl}^-} = \frac{18}{23} \text{ mol}$ , and  $\tau'_{\text{Mg}^{2+}, \text{Br}^-} = \frac{27}{23} \text{ mol}$ . These values add up

in a way that is stoichiometrically consistent, e.g., extracting the  $\text{Na}^+$  amount from these hypothetical electrolyte component amounts yields  $\tau'_{\text{Na}^+, \text{Br}^-} + \tau'_{\text{Na}^+, \text{Cl}^-} + 2 \cdot \tau'_{\text{Na}^+, \text{SO}_4^{2-}} = \frac{15+10+90}{23} \text{ mol} = 5 \text{ mol Na}^+$ . In our implementation of this approach,

55 the normalized, mole-fraction-based version of  $\tau_{c,a}$  is used directly in Eq. (16).

### S2 Computational efficiency of organic–inorganic mixing approaches

We tested the speed of the three mixing approaches, finding that the ZSR-style mixing approach takes approximately five to six times longer than aquelec or aquorg. Results are shown in Tables S1 and S2.

**Table S1.** Time elapsed for multi-run simulations of the AIOMFAC-VISC mixing approaches. Each trial consisted of 200,000 runs. See also Table S2.

| Trial | aquelec | aquorg | ZSR     |
|-------|---------|--------|---------|
| 1     | 5.02 s  | 5.08 s | 27.89 s |
| 2     | 4.39 s  | 4.38 s | 27.45 s |
| 3     | 4.36 s  | 4.28 s | 23.09 s |
| 4     | 4.45 s  | 4.33 s | 23.84 s |
| 5     | 4.33 s  | 4.33 s | 21.66 s |

**Table S2.** Mean run time for a test case<sup>a</sup> for each AIOMFAC-VISC mixing approach using a single CPU core<sup>b</sup>. See also Table S1.

| Trial | aquelec             | aquorg              | ZSR                  |
|-------|---------------------|---------------------|----------------------|
| 1     | 25.08 $\mu\text{s}$ | 25.39 $\mu\text{s}$ | 139.45 $\mu\text{s}$ |
| 2     | 21.95 $\mu\text{s}$ | 21.88 $\mu\text{s}$ | 137.27 $\mu\text{s}$ |
| 3     | 21.80 $\mu\text{s}$ | 21.41 $\mu\text{s}$ | 115.47 $\mu\text{s}$ |
| 4     | 22.27 $\mu\text{s}$ | 21.64 $\mu\text{s}$ | 119.22 $\mu\text{s}$ |
| 5     | 21.64 $\mu\text{s}$ | 21.64 $\mu\text{s}$ | 108.28 $\mu\text{s}$ |

<sup>a</sup> The test case was 1:1 sucrose– $\text{Ca}(\text{NO}_3)_2$  at  $a_w = 0.625$ ; see Fig. 10a.

<sup>b</sup> Processor: Intel(R) Core(TM) i5-6200U CPU @ 2.30GHz

### S3 Additional ternary and quaternary aqueous electrolyte mixtures

60 Figures S1 to S4 show additional data for ternary and quaternary aqueous electrolyte mixtures. See Table 3 for information on each dataset.

**S4 Cation–anion parameter substitutions**

When data are unavailable for certain cation–anion interactions, substitute values are used for the related parameters; see Table S3.

**Table S3.** Cation–anion pair substitutions in Table 6.

| Missing Pair                        | Replacement Pair                   |
|-------------------------------------|------------------------------------|
| $\text{Ca}^{2+}, \text{Br}^{-}$     | $\text{Ca}^{2+}, \text{Cl}^{-}$    |
| $\text{Mg}^{2+}, \text{Br}^{-}$     | $\text{Mg}^{2+}, \text{Cl}^{-}$    |
| $\text{Ca}^{2+}, \text{SO}_4^{2-}$  | $\text{Mg}^{2+}, \text{SO}_4^{2-}$ |
| $\text{Li}^{+}, \text{HSO}_4^{-}$   | $\text{Na}^{+}, \text{HSO}_4^{-}$  |
| $\text{K}^{+}, \text{HSO}_4^{-}$    | $\text{Na}^{+}, \text{HSO}_4^{-}$  |
| $\text{NH}_4^{+}, \text{HSO}_4^{-}$ | $\text{Na}^{+}, \text{HSO}_4^{-}$  |
| $\text{Ca}^{2+}, \text{HSO}_4^{-}$  | $\text{Na}^{+}, \text{HSO}_4^{-}$  |
| $\text{Mg}^{2+}, \text{HSO}_4^{-}$  | $\text{Na}^{+}, \text{HSO}_4^{-}$  |
| $\text{NH}_4^{+}, \text{I}^{-}$     | $\text{NH}_4^{+}, \text{Cl}^{-}$   |
| $\text{Ca}^{2+}, \text{I}^{-}$      | $\text{Ca}^{2+}, \text{Cl}^{-}$    |
| $\text{Mg}^{2+}, \text{I}^{-}$      | $\text{Mg}^{2+}, \text{Cl}^{-}$    |

65 **S5 Additional binary aqueous electrolyte curves**

The scatter among similar measurement points is one reason for the inclusion of a 2% uncertainty in viscosity applied to all bulk measurements. This is demonstrated by Fig. S8, which shows measurements and AIOMFAC-VISC predicted viscosities for temperatures between 268.15 K and 328.15 K.

**S6 Additional aqueous organic–inorganic viscosity predictions**

70 Richards et al. (2020b) included viscosity data for 1:1 organic–inorganic mixtures using a measurement technique described in Richards et al. (2020a). AIOMFAC-VISC predictions using the three mixing approaches described in Sect. 3.4 are shown in Figs. S6 and S7.

S7 Scatter among similar measurement points and temperature dependence

75 The scatter among similar measurement points is one reason for the inclusion of a 2 % uncertainty in viscosity applied to all bulk measurements. This is demonstrated by Fig. S8, which shows measurements and AIOMFAC-VISC predicted viscosities for temperatures between 268.15 K and 328.15 K.

S8 Mixed  $\alpha$ -pinene SOA + ammonium sulfate aerosol components

The aerosol system discussed in Sect. 5 and featured in Figs. 11–13 is defined in Table S4.

**Table S4.** Components for  $\alpha$ -pinene SOA : ammonium sulfate containing aerosol with OIR = 1. Surrogate components for  $\alpha$ -pinene oxidation by ozone are derived from MCM, and their fixed dry amounts are given in  $\text{mol m}^{-3}$  in the particulate matter (PM) phase.

| Name (MCM)                   | O:C   | $M$ ( $\text{g mol}^{-1}$ ) | PM conc. ( $\text{mol m}^{-3}$ ) | SMILES                                                           |
|------------------------------|-------|-----------------------------|----------------------------------|------------------------------------------------------------------|
| C107OOH                      | 0.4   | 200.231                     | $6.56 \times 10^{-11}$           | <chem>O=CCC1CC(OO)(C(=O)C)C1(C)C</chem>                          |
| PINONIC                      | 0.3   | 184.232                     | $3.71 \times 10^{-11}$           | <chem>OC(=O)CC1CC(C(=O)C)C1(C)C</chem>                           |
| C97OOH                       | 0.44  | 188.22                      | $7.55 \times 10^{-10}$           | <chem>OCC1CC(OO)(C(=O)C)C1(C)C</chem>                            |
| C108OOH                      | 0.5   | 216.231                     | $2.52 \times 10^{-8}$            | <chem>O=CCC(CC(=O)C(=O)C)C(C)(C)OO</chem>                        |
| C89CO2H                      | 0.33  | 170.206                     | $6.03 \times 10^{-12}$           | <chem>O=CCC1CC(C(=O)O)C1(C)C</chem>                              |
| PINIC                        | 0.444 | 186.205                     | $2.41 \times 10^{-9}$            | <chem>OC(=O)CC1CC(C(=O)O)C1(C)C</chem>                           |
| C921OOH                      | 0.56  | 204.22                      | $2.76 \times 10^{-9}$            | <chem>OCC(=O)C1(OO)CC(CO)C1(C)C</chem>                           |
| C109OOH                      | 0.4   | 200.231                     | $4.72 \times 10^{-12}$           | <chem>O OCC(=O)C1CC(CC=O)C1(C)C</chem>                           |
| C812OOH                      | 0.625 | 190.194                     | $2.53 \times 10^{-9}$            | <chem>OCC1CC(OO)(C(=O)O)C1(C)C</chem>                            |
| HOPINONIC                    | 0.4   | 200.232                     | $6.98 \times 10^{-10}$           | <chem>OCC(=O)C1CC(CC(=O)O)C1(C)C</chem>                          |
| C811OH                       | 0.375 | 158.094                     | $2.68 \times 10^{-11}$           | <chem>OCC1CC(C(=O)O)C1(C)C</chem>                                |
| C813OOH                      | 0.75  | 206.193                     | $9.89 \times 10^{-10}$           | <chem>OCC(CC(=O)C(=O)O)C(C)(C)OO</chem>                          |
| ALDOL dimer                  | 0.375 | 368.421                     | $1.80 \times 10^{-10}$           | <chem>CC(=O)C(=O)CC(C(C=O)=CCC1CC(C(O)=O)C1(C)C)C(C)(C)OO</chem> |
| ESTER dimer                  | 0.375 | 368.421                     | $7.20 \times 10^{-10}$           | <chem>CC1(C)C(CC1C(O)=O)CC(=O)OCC(=O)C2CC(CC(O)=O)C2(C)C</chem>  |
| $(\text{NH}_4)_2\text{SO}_4$ | NA    | 132.14                      | $5.89 \times 10^{-8}$            | <chem>O=S([O-])([O-])=O.[NH4+].[NH4+]</chem>                     |

The molar concentrations of the components in the PM phase (“PM conc.”) are defined such that OIR = 1. However, under true atmospheric conditions, semi-volatile component concentrations would be expected to change, which would impact OIR. This table is adapted from Gervasi et al. (2020).

## References

- 80 Baldelli, A., Power, R. M., Miles, R. E. H., Reid, J. P., and Vehring, R.: Effect of crystallization kinetics on the properties of spray dried microparticles, *Aerosol Science and Technology*, 50, 693–704, <https://doi.org/10.1080/02786826.2016.1177163>, <https://www.tandfonline.com/doi/full/10.1080/02786826.2016.1177163>, 2016.
- Fabuss, B. M., Korosi, A., and Othmer, D. F.: Viscosities of aqueous solutions of several electrolytes present in sea water, *Journal of Chemical & Engineering Data*, 14, 192–197, <https://doi.org/10.1021/je60041a025>, <https://pubs.acs.org/doi/abs/10.1021/je60041a025>, 1969.
- 85 Gervasi, N. R., Topping, D. O., and Zuend, A.: A predictive group-contribution model for the viscosity of aqueous organic aerosol, *Atmospheric Chemistry and Physics*, 20, 2987–3008, <https://doi.org/10.5194/acp-20-2987-2020>, <https://acp.copernicus.org/articles/20/2987/2020/>, 2020.
- Goldsack, D. E. and Franchetto, A. A.: The viscosity of concentrated electrolyte solutions—III. A mixture law, *Electrochimica Acta*, 22, 1287–1294, [https://doi.org/10.1016/0013-4686\(77\)87012-6](https://doi.org/10.1016/0013-4686(77)87012-6), <https://www.sciencedirect.com/science/article/pii/0013468677870126>, 1977.
- 90 Iyoki, S., Iwasaki, S., Kuriyama, Y., and Uemura, T.: Densities, viscosities, and surface tensions for the two ternary systems water + lithium bromide + lithium iodide + lithium chloride + lithium nitrate, *Journal of Chemical & Engineering Data*, 38, 302–305, <https://doi.org/10.1021/je00010a031>, <https://pubs.acs.org/doi/abs/10.1021/je00010a031>, 1993.
- Laliberté, M.: Model for Calculating the Viscosity of Aqueous Solutions, *Journal of Chemical & Engineering Data*, 52, 321–335, <https://doi.org/10.1021/je0604075>, <https://doi.org/10.1021/je0604075>, 2007.
- 95 Nishikata, E., Ishii, T., and Ohta, T.: Viscosities of aqueous hydrochloric acid solutions, and densities and viscosities of aqueous hydroiodic acid solutions, *Journal of Chemical & Engineering Data*, 26, 254–256, <https://doi.org/10.1021/je00025a008>, <https://pubs.acs.org/doi/abs/10.1021/je00025a008>, 1981.
- Nowlan, M.-F., Doan, T. H., and Sangster, J.: Prediction of the viscosity of mixed electrolyte solutions from single-salt data, *The Canadian Journal of Chemical Engineering*, 58, 637–642, <https://doi.org/10.1002/cjce.5450580514>, <https://onlinelibrary.wiley.com/doi/abs/10.1002/cjce.5450580514>,  
100 [\\_eprint: https://onlinelibrary.wiley.com/doi/pdf/10.1002/cjce.5450580514](https://onlinelibrary.wiley.com/doi/pdf/10.1002/cjce.5450580514), 1980.
- Richards, D. S., Trobaugh, K. L., Hajek-Herrera, J., and Davis, R. D.: Dual-Balance Electrodynamic Trap as a Microanalytical Tool for Identifying Gel Transitions and Viscous Properties of Levitated Aerosol Particles, *Analytical Chemistry*, 92, 3086–3094, <https://doi.org/10.1021/acs.analchem.9b04487>, <https://pubs.acs.org/doi/10.1021/acs.analchem.9b04487>, 2020a.
- Richards, D. S., Trobaugh, K. L., Hajek-Herrera, J., Price, C. L., Sheldon, C. S., Davies, J. F., and Davis, R. D.: Ion-molecule interactions  
105 enable unexpected phase transitions in organic-inorganic aerosol, *Science Advances*, 6, eabb5643, <https://doi.org/10.1126/sciadv.abb5643>, <https://advances.sciencemag.org/content/6/47/eabb5643>, 2020b.
- Song, Y.-C., Lilek, J., Lee, J. B., Chan, M. N., Wu, Z., Zuend, A., and Song, M.: Viscosity and phase state of aerosol particles consisting of sucrose mixed with inorganic salts, *Atmospheric Chemistry and Physics*, 21, 10 215–10 228, <https://doi.org/10.5194/acp-21-10215-2021>,  
<https://acp.copernicus.org/articles/21/10215/2021/>, 2021.
- 110 Wimby, J. M. and Berntsson, T. S.: Viscosity and density of aqueous solutions of lithium bromide, lithium chloride, zinc bromide, calcium chloride and lithium nitrate. 1. Single salt solutions, *Journal of Chemical & Engineering Data*, 39, 68–72, <https://doi.org/10.1021/je00013a019>, <https://pubs.acs.org/doi/abs/10.1021/je00013a019>, 1994.
- Zhang, H.-L., Chen, G.-H., and Han, S.-J.: Viscosity and Density of H<sub>2</sub>O + NaCl + CaCl<sub>2</sub> and H<sub>2</sub>O + KCl + CaCl<sub>2</sub> at 298.15 K, *Journal of Chemical & Engineering Data*, 42, 526–530, <https://doi.org/10.1021/je9602733>, <https://doi.org/10.1021/je9602733>, 1997.

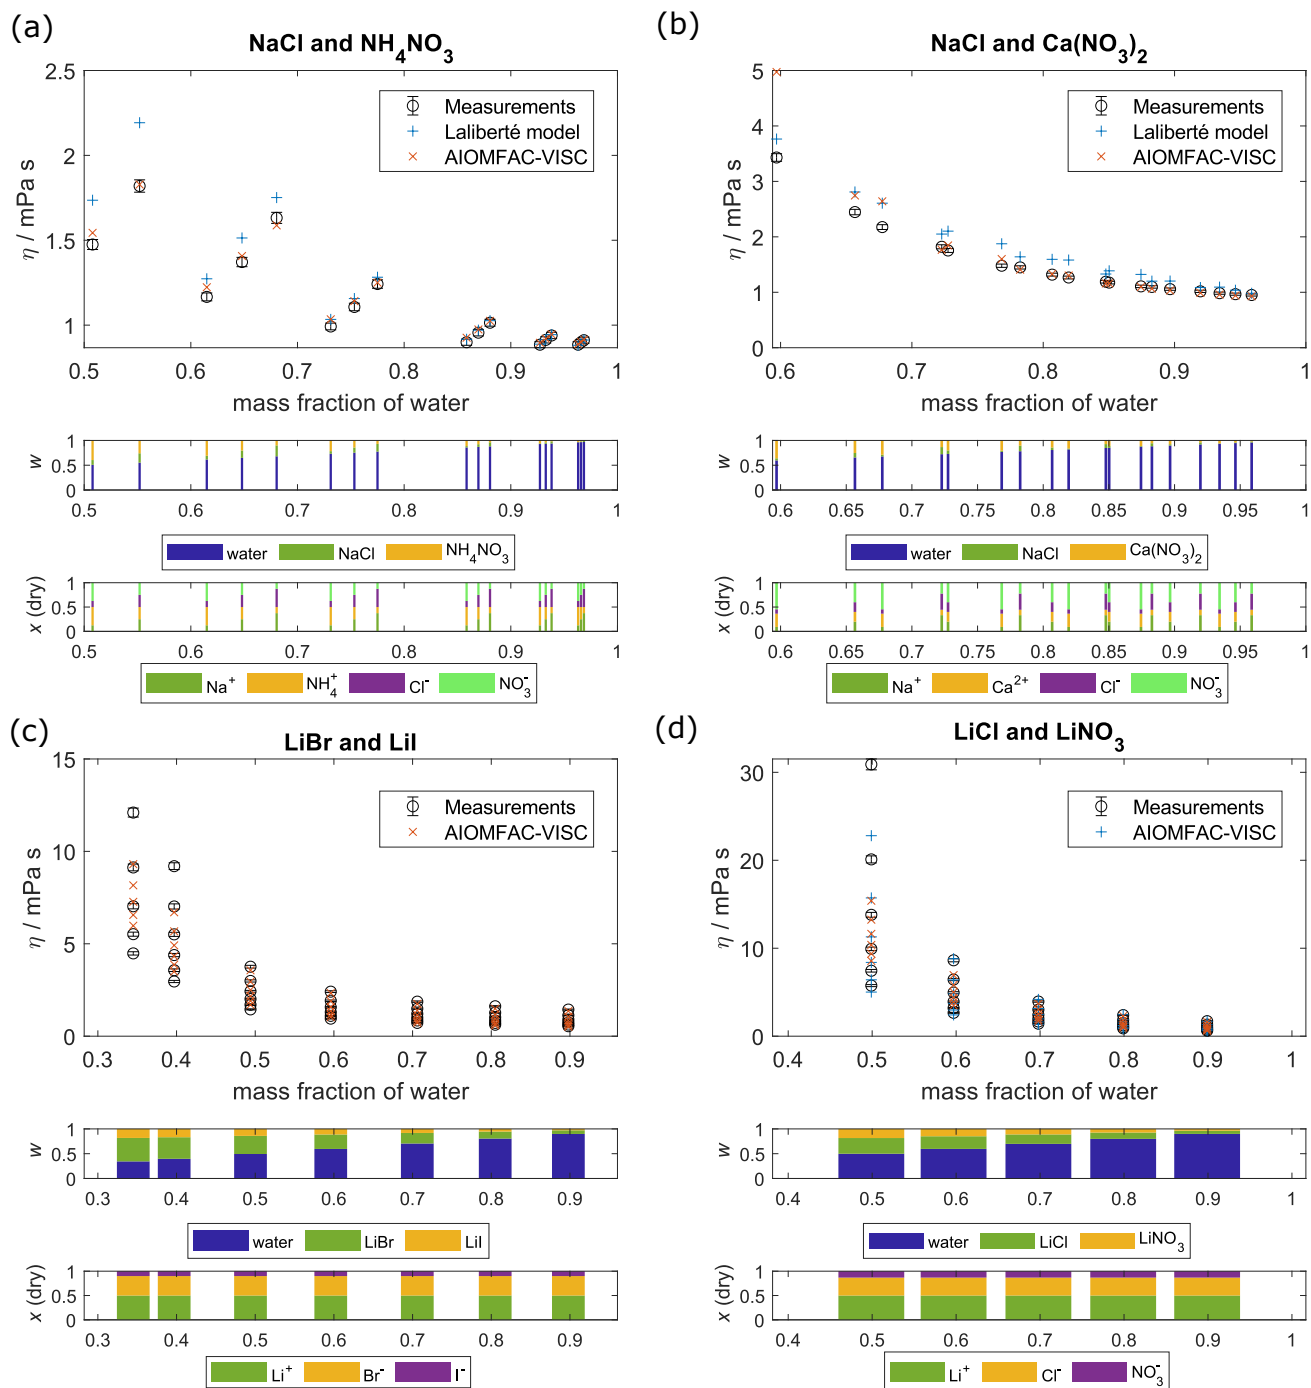

**Figure S1.** Comparison of AIOMFAC-VISC and the Laliberté model for ternary and quaternary aqueous electrolyte mixtures:(a) NaCl and  $\text{NH}_4\text{NO}_3$  (Nowlan et al., 1980); (b) NaCl and  $\text{Ca}(\text{NO}_3)_2$  (Nowlan et al., 1980); (c) LiBr and LiI (Iyoki et al., 1993); (d) LiCl and  $\text{LiNO}_3$  (Iyoki et al., 1993). Top panel: viscosity versus mass fraction of water with 2% error in viscosity included for all measurements. Middle panel: mass fractions of mixture input components. Bottom panel: mole fractions of ions in dry mixture.

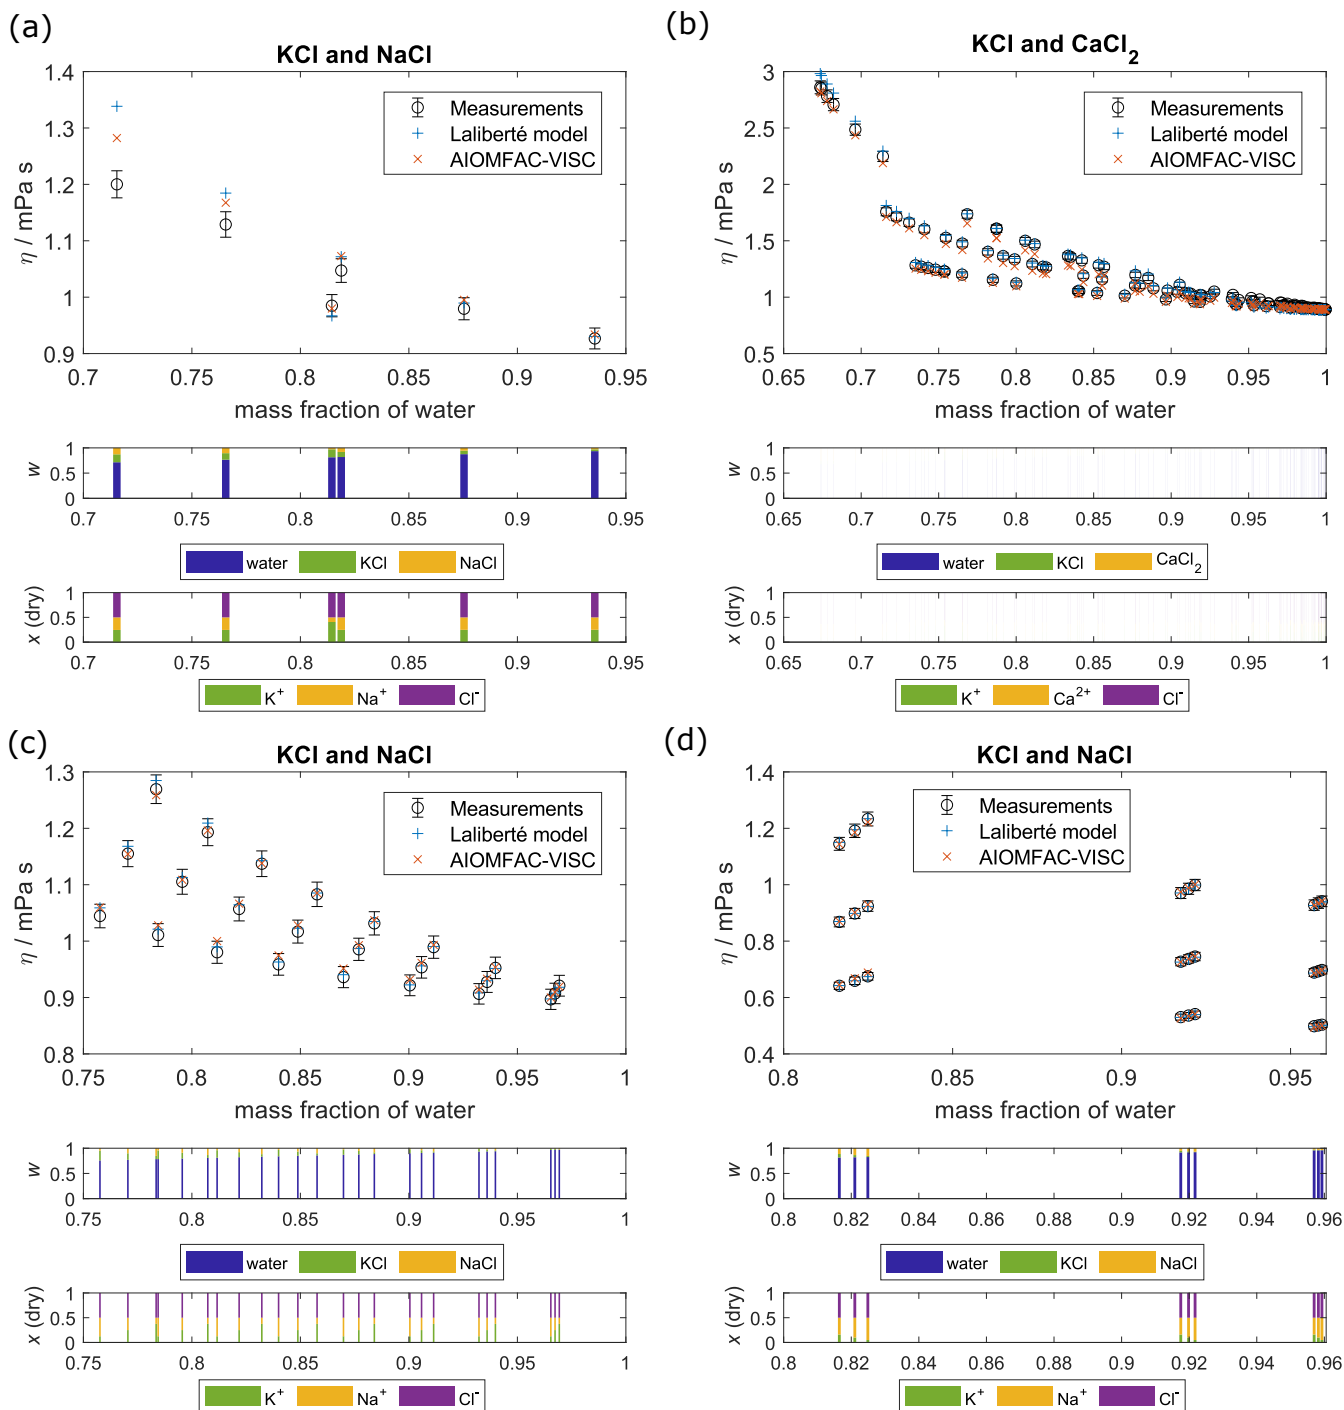

**Figure S2.** Comparison of AIOMFAC-VISC and the Laliberté model for ternary aqueous electrolyte mixtures: (a) KCl and NaCl (Goldsack and Franchetto, 1977); (b) KCl and  $CaCl_2$  (Zhang et al., 1997); (c) KCl and NaCl (Nowlan et al., 1980); (d) KCl and NaCl (Fabuss et al., 1969). Top panel: viscosity versus mass fraction of water with 2% error in viscosity included for all measurements. Middle panel: mass fractions of mixture input components. Bottom panel: mole fractions of ions in dry mixture.



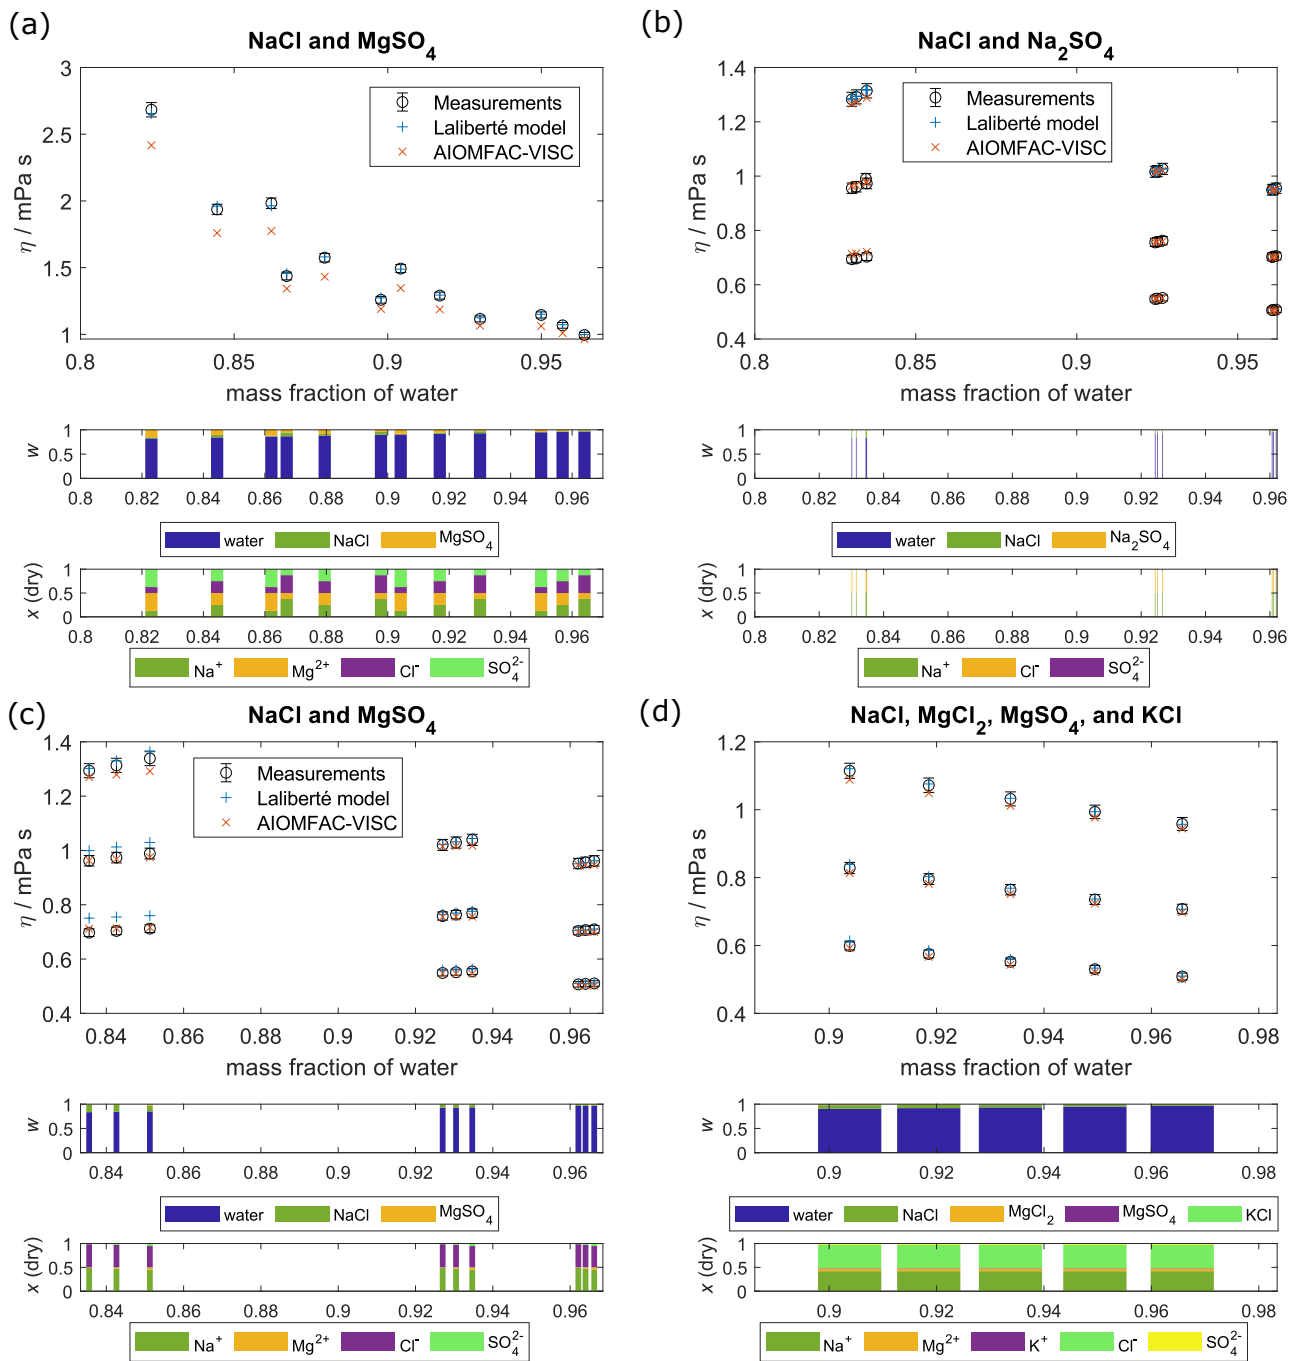

**Figure S3.** Comparison of AIOMFAC-VISC and the Laliberté model for ternary aqueous electrolyte mixtures: (a) NaCl and  $\text{MgSO}_4$  (Nowlan et al., 1980); (b) NaCl and  $\text{Na}_2\text{SO}_4$  (Nowlan et al., 1980); (c) NaCl and  $\text{MgSO}_4$  (Fabuss et al., 1969); (d) NaCl,  $\text{MgCl}_2$ ,  $\text{MgSO}_4$ , and KCl (Fabuss et al., 1969). Top panel: viscosity versus mass fraction of water with 2 % error in viscosity included for all measurements. Middle panel: mass fractions of mixture input components. Bottom panel: mole fractions of ions in dry mixture.

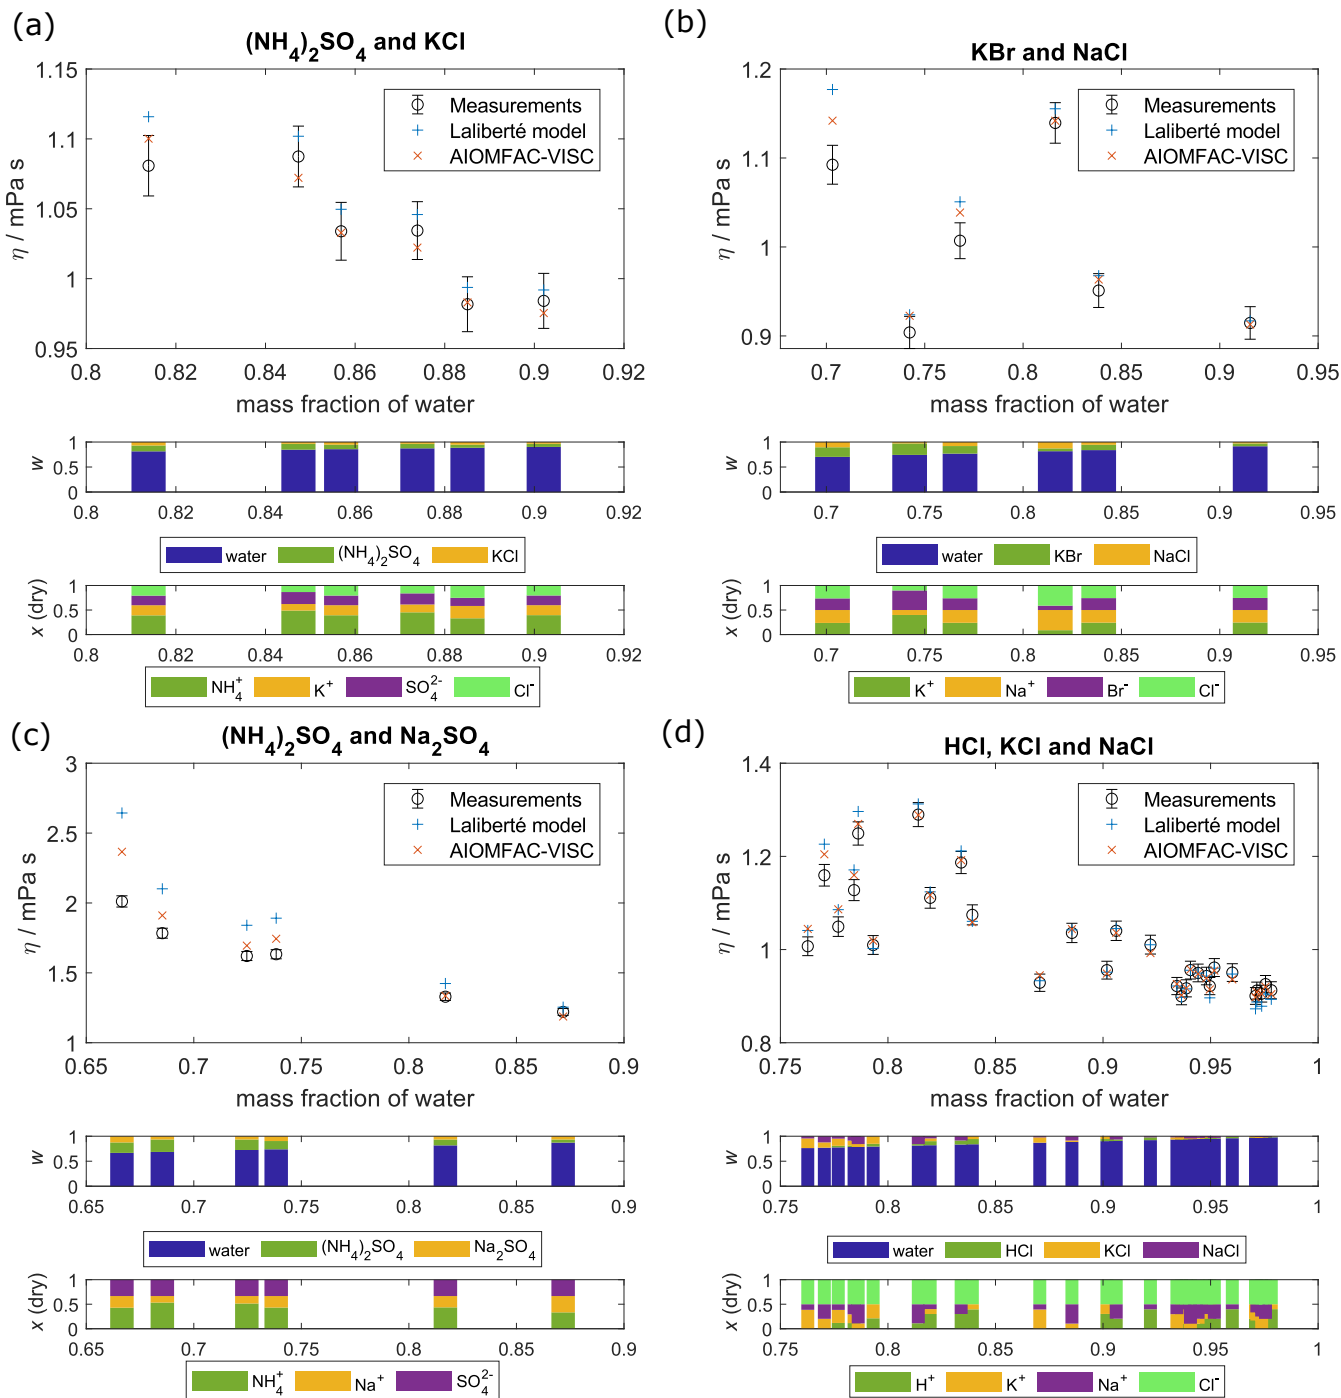

**Figure S4.** Comparison of AIOMFAC-VISC and the Laliberté model for ternary aqueous electrolyte mixture data from Goldsack and Franchetto (1977): (a)  $(\text{NH}_4)_2\text{SO}_4$  and KCl; (b) KBr and NaCl; (c)  $(\text{NH}_4)_2\text{SO}_4$  and  $\text{Na}_2\text{SO}_4$ ; (d) HCl, KCl and NaCl. Top panel: viscosity versus mass fraction of water with 2 % error in viscosity included for all measurements. Middle panel: mass fractions of mixture input components. Bottom panel: mole fractions of ions in dry mixture.

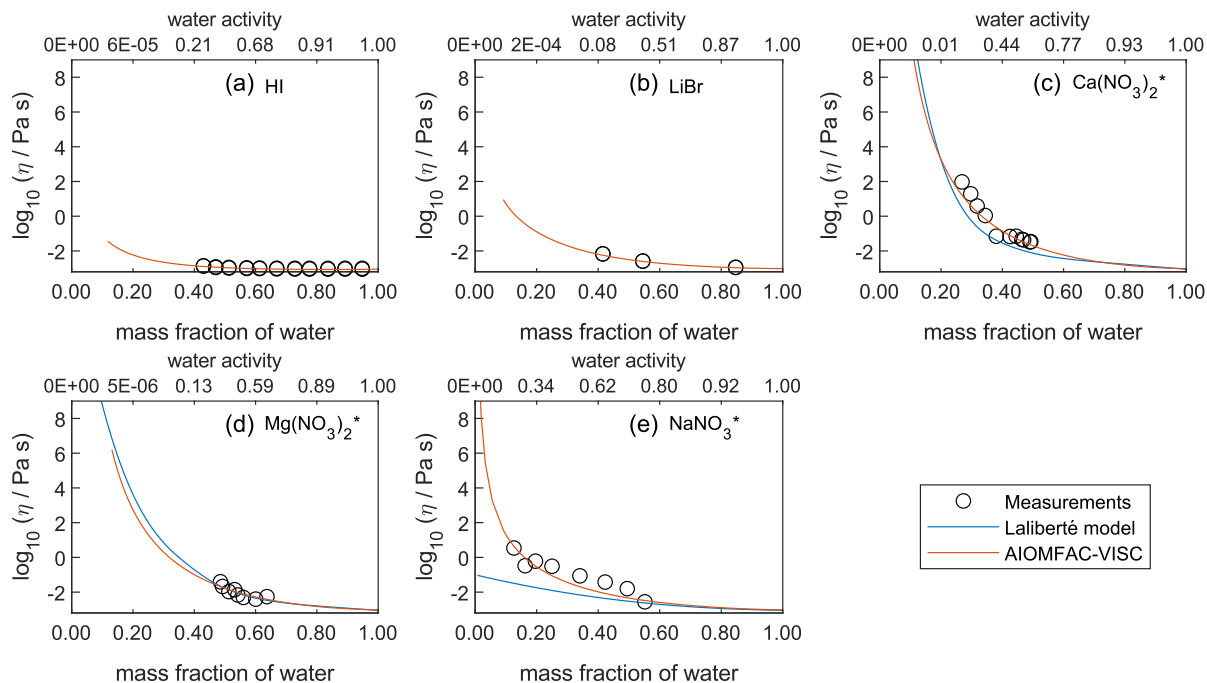

**Figure S5.** Comparison of the Laliberté model, AIOMFAC-VISC, and viscosity measurements versus mass fraction of water (bottom axis) and AIOMFAC-predicted water activity (top axis) for electrolytes not fitted by the Laliberté model (a, b) and droplet-based measurements of binary aqueous electrolyte solutions (c, d, e) at 295 K with measurements shown for  $295 \pm 5$  K: (a) HI (Nishikata et al., 1981); (b) LiBr (Wimby and Berntsson, 1994); (c)  $\text{Ca}(\text{NO}_3)_2$  (Song et al., 2021); (d)  $\text{Mg}(\text{NO}_3)_2$  (Song et al., 2021); (e)  $\text{NaNO}_3$  (Baldelli et al., 2016). See also caption to Fig. 4.

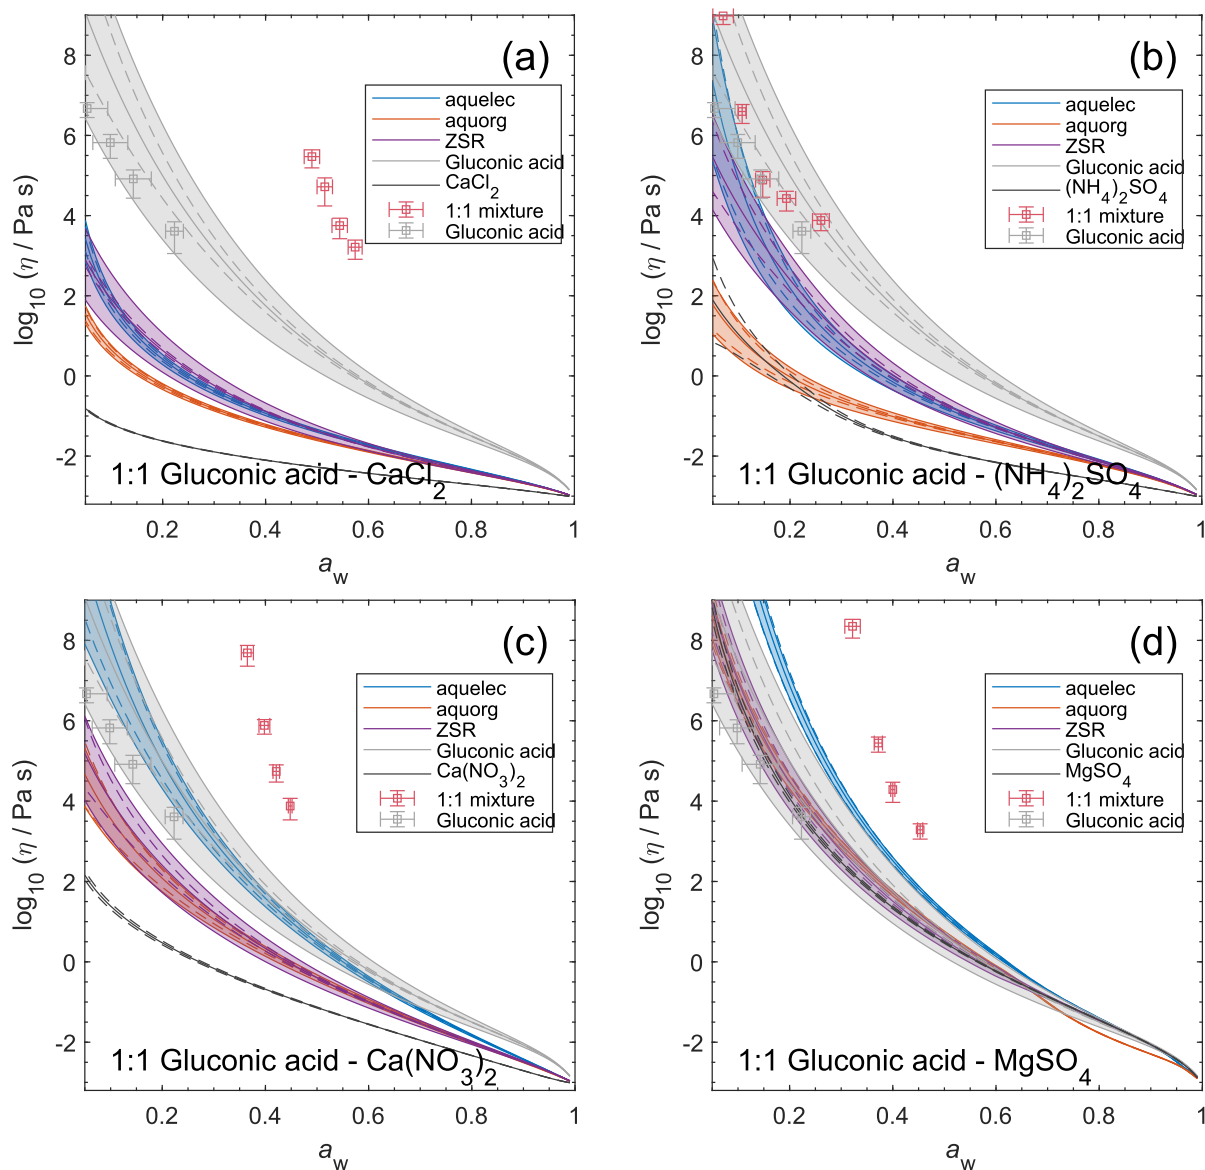

**Figure S6.** Viscosity predictions for aerosol surrogate mixtures containing gluconic acid and divalent salts at varying water activity,  $a_w$  (RH), with a prescribed organic-to-inorganic dry mass ratio (OIR). Three mixing models – aquelec, aquorg, and ZSR – are shown alongside the viscosity measurements. Model sensitivity, defined by the impact of a 2 % change in aerosol water content, is shown by the dashed curves. Shaded regions show the potential viscosity prediction error introduced by a  $\pm 5$  % error in the (estimated) glass transition temperature of the organic component. AIOMFAC-VISC predictions are also included for the binary aqueous sucrose and aqueous salt systems, which correspond to the organic and inorganic subsystems used in each mixing model (see Section 3.4). Model–measurement deviations for the organic–salt mixtures are likely due to a phase transition, such as gel formation.

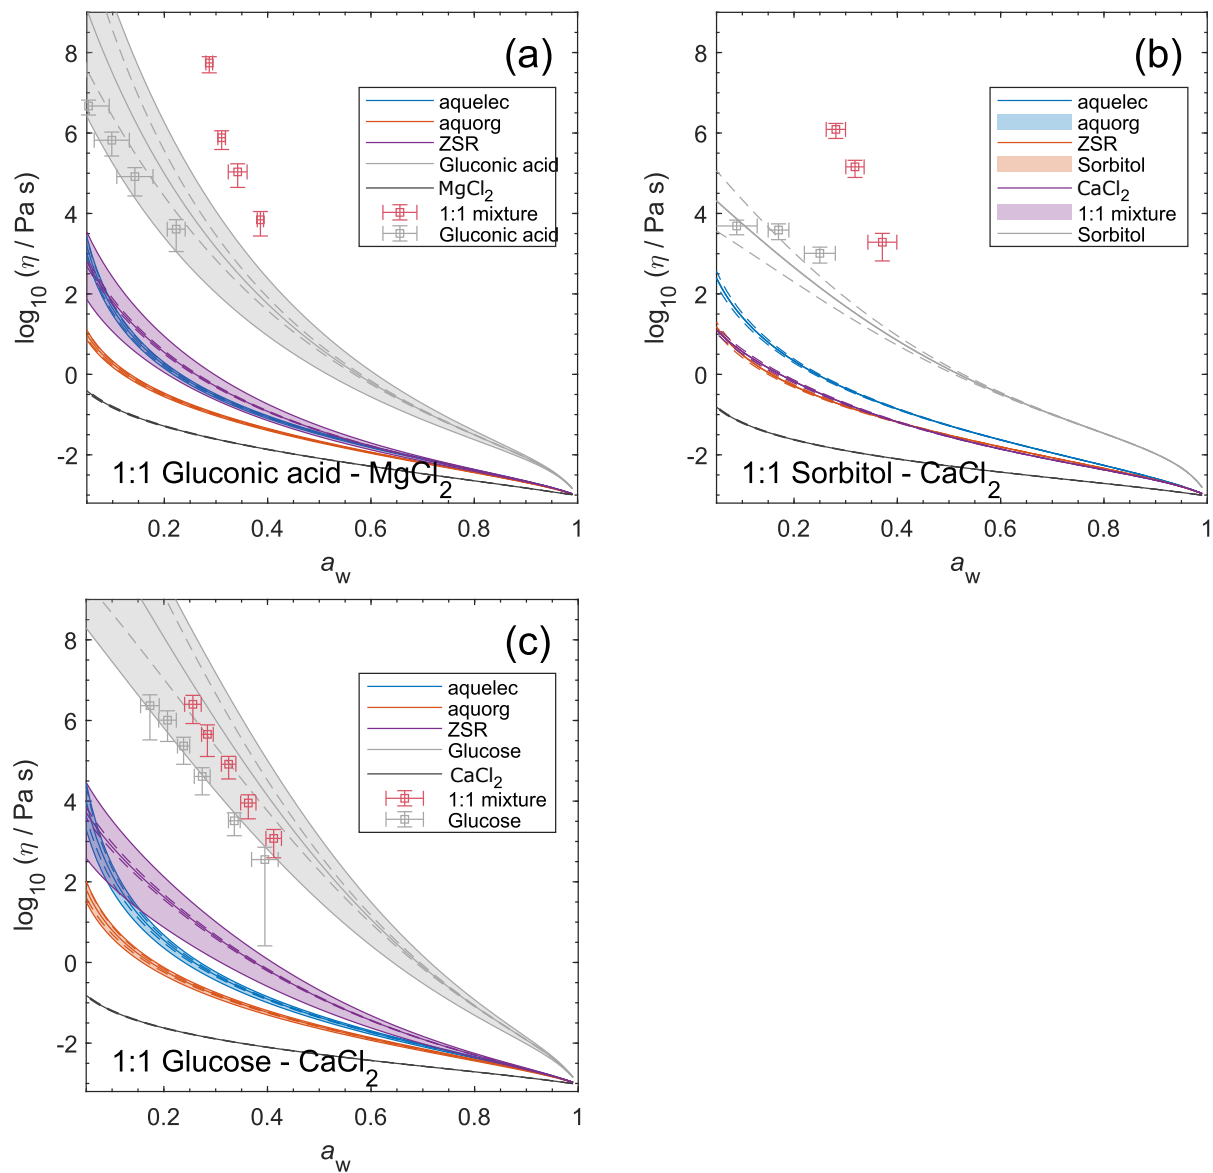

**Figure S7.** Viscosity predictions for aerosol surrogate mixtures containing organic compounds and divalent ions/salts at varying water activity,  $a_w$  (RH), with a prescribed organic-to-inorganic dry mass ratio (OIR). See also caption to Fig. S6.

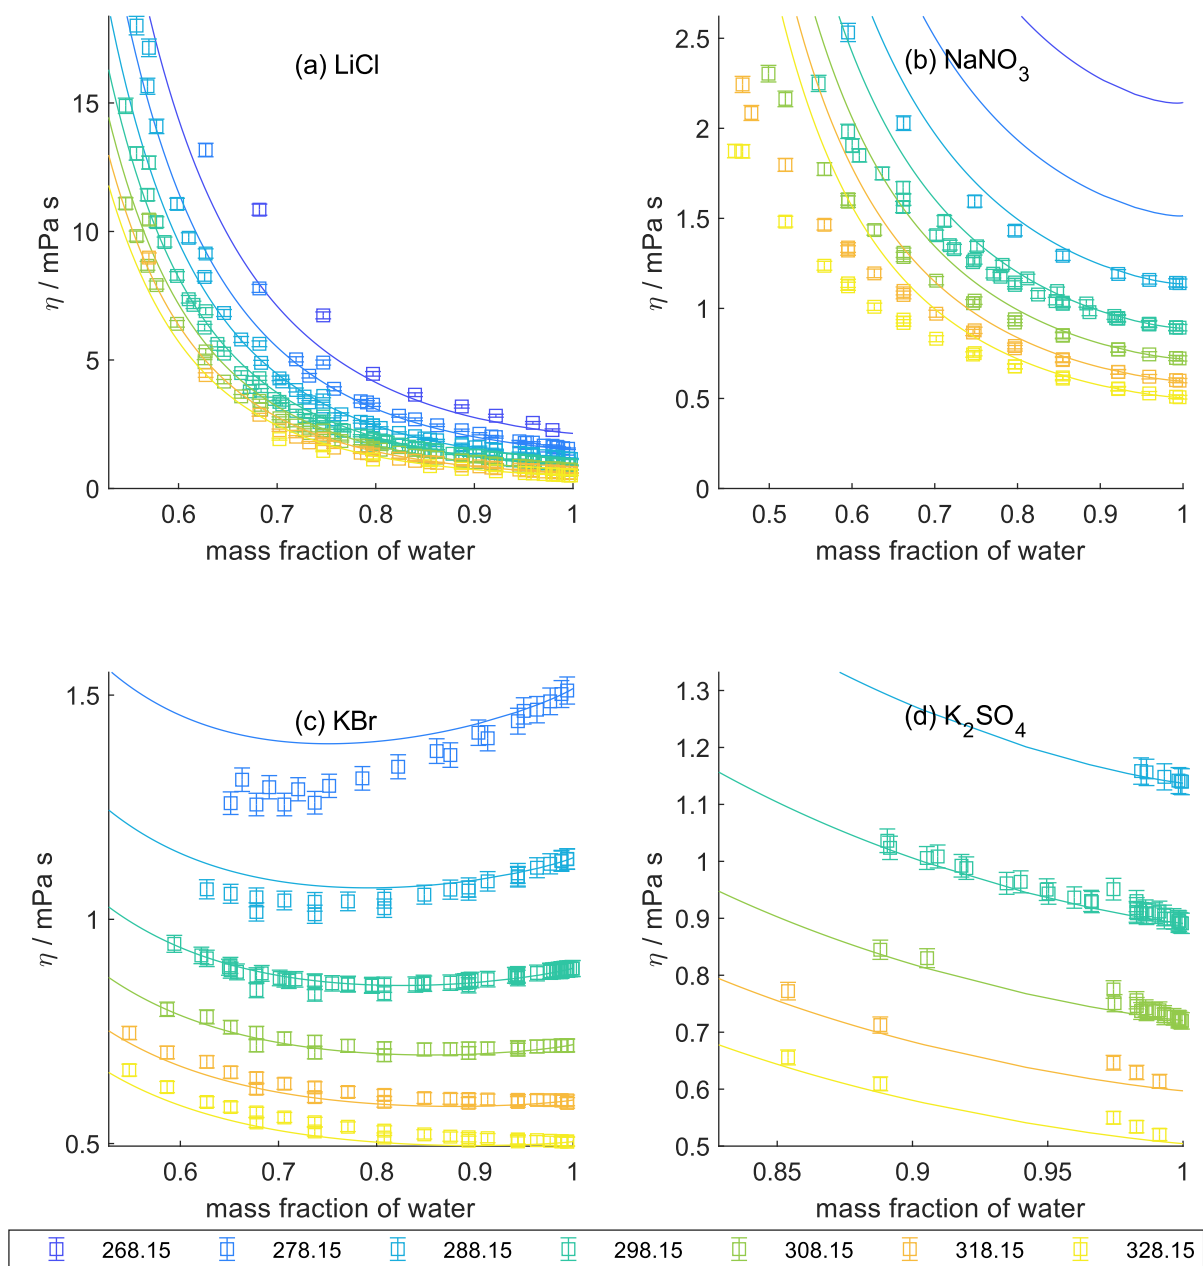

**Figure S8.** Viscosity measurements aggregated by Laliberté (2007) for a selection of binary aqueous solutions at several temperatures between 268.15 and 323.15 K: (a) LiCl; (b) NaNO<sub>3</sub>; (c) KBr; (d) K<sub>2</sub>SO<sub>4</sub>. 2 % viscosity error bars are included to account for scatter among similar measurement points. Solid lines are AIOMFAC-VISC predictions.
